# Supplementary material for: Facile synthesis of hyperbranched Eu-MOF structures for the construction of a CsPbBr3/Eu-MOF composite and its application as a ratiometric fluorescent probe
Source: Royal Society of Chemistry journal article supplement (doi:10.1039/d2tc04879e), 2023-01-01
Supplement: d2tc04879e1.pdf [file d2tc04879e1.pdf]

## Supporting Information

# Facile Synthesis of Hyperbranched Eu-MOF Structures for the Construction of CsPbBr<sub>3</sub>/Eu-MOF composite and Its Application as Ratiometric Fluorescent Probe

Wenwei Lai<sup>1</sup>, Chuanli Wu<sup>1,2</sup>, Xiuxun Han<sup>1,2\*</sup>

<sup>1</sup>*Institute of Optoelectronic Materials and Devices, Faculty of Materials Metallurgy and Chemistry, Jiangxi University of Science and Technology, Ganzhou 341000, China*

<sup>2</sup>*National Rare Earth Function Materials Innovation Center, Ganzhou 34100, China*

\* Corresponding authors.

*E-mail addresses:* xxhan@jxust.edu.cn (X. Han)

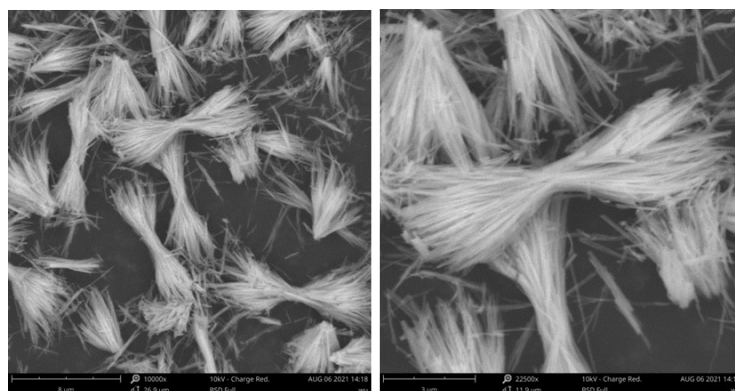

**Figure S1.** The SEM images of Eu-MOF synthesized without Al(Ac)<sub>3</sub> additive.

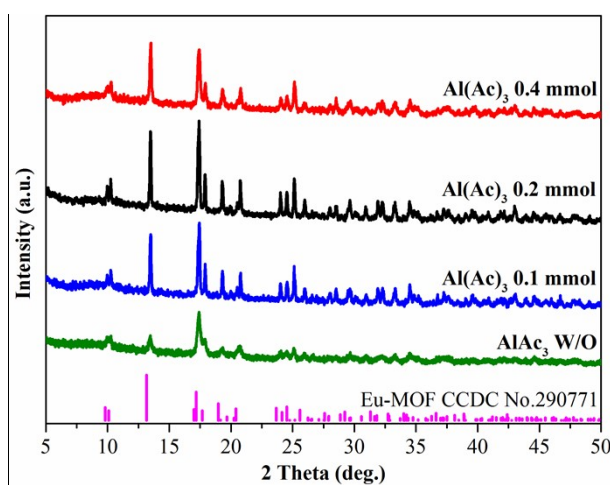

**Figure S2.** XRD patterns of Eu-MOF synthesized with different amounts of Al(Ac)<sub>3</sub>.

**Table S1.** pH values of synthesis mixtures before and after crystallization

| Additive            | pH <sub>1</sub> (before) | pH <sub>2</sub> (after) |
|---------------------|--------------------------|-------------------------|
| Al(Ac) <sub>3</sub> | 4.0                      | 2.2                     |
| No additive         | 3.9                      | 2.1                     |

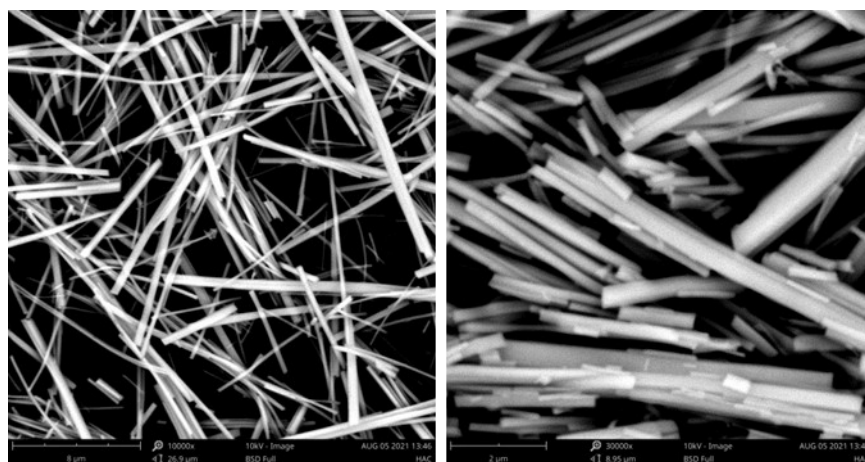

**Figure S3.** The SEM images of Eu-MOF synthesized with HAc additive.

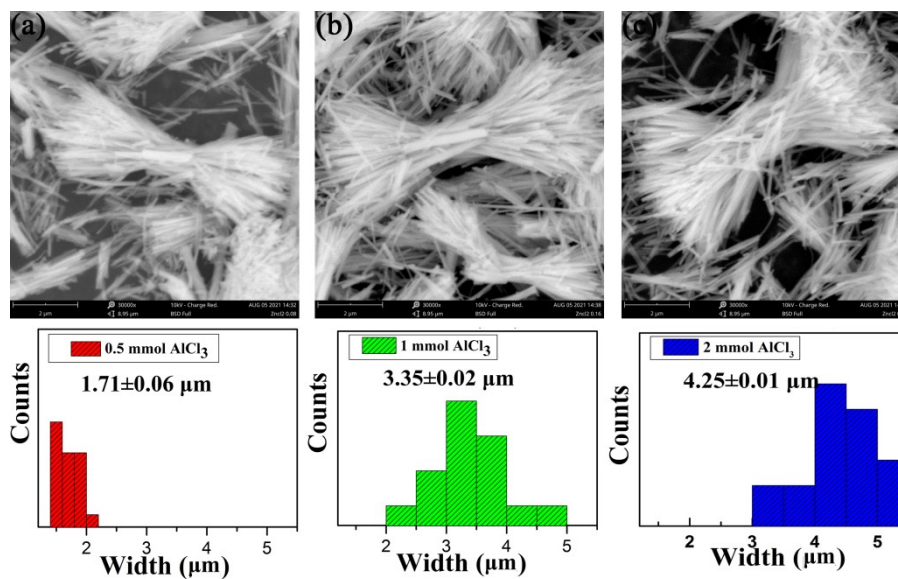

**Figure S4.** SEM images of Eu-MOF synthesized with different amounts of AlCl<sub>3</sub>:(a) 0.5 mmol, (b) 1 mmol, (c) 2 mmol, and the corresponding dual fantails size distribution statistics.

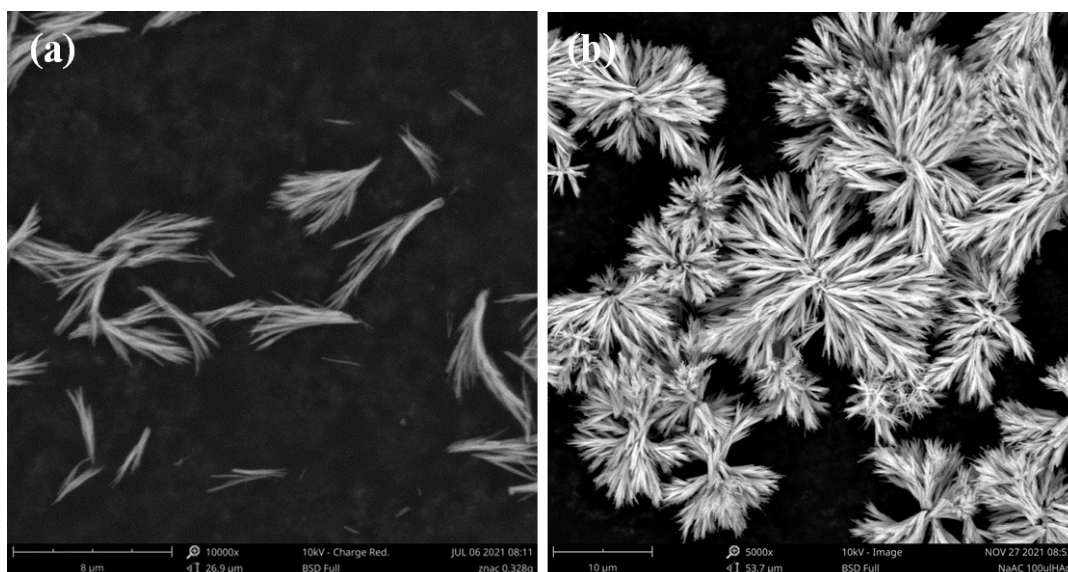

**Figure S5.** SEM images of Eu-MOF synthesized with different additives: (a)NaAc, (b) NaAc+HAc.

**Table S2.** pH Values of additives in water solution and pH values of the reaction solution before and after crystallization

| Additives           | pH (water solution) | pH <sub>1</sub> (before) | pH <sub>2</sub> (after) |
|---------------------|---------------------|--------------------------|-------------------------|
| Al(Ac) <sub>3</sub> | 4.0                 | 4.0                      | 2.2                     |
| Zn(Ac) <sub>2</sub> | 6.3                 | 6.4                      | 3.2                     |
| Pb(Ac) <sub>2</sub> | 5.9                 | 5.6                      | 2.2                     |
| Cu(Ac) <sub>2</sub> | 5.6                 | 5.1                      | 2.3                     |
| Ni(Ac) <sub>2</sub> | 6.8                 | 6.4                      | 2.4                     |
| Mg(Ac) <sub>2</sub> | 7.7                 | 6.5                      | 4.0                     |
| NaAc                | 8.2                 | 6.6                      | 4.2                     |

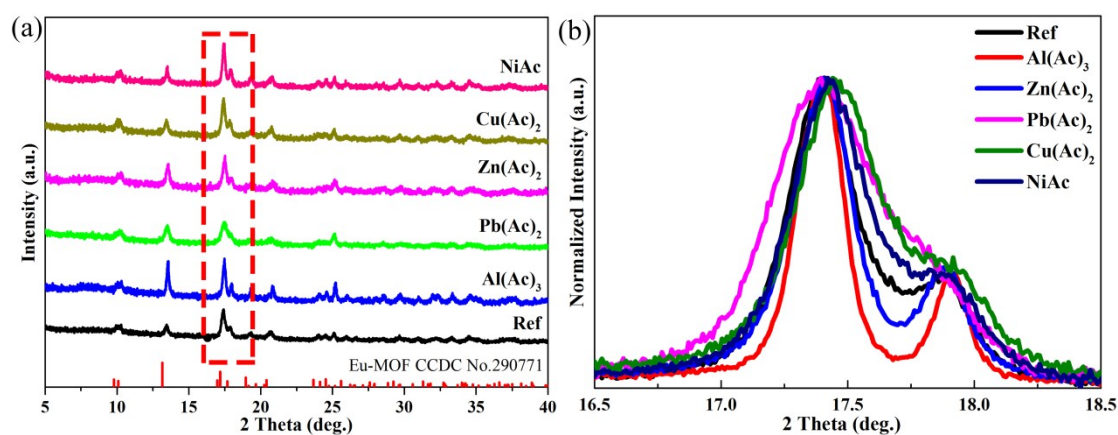

**Figure S6.** (a) XRD patterns of Eu-MOF synthesized with different additives; (b) Fine test of area indicated with dotted line.

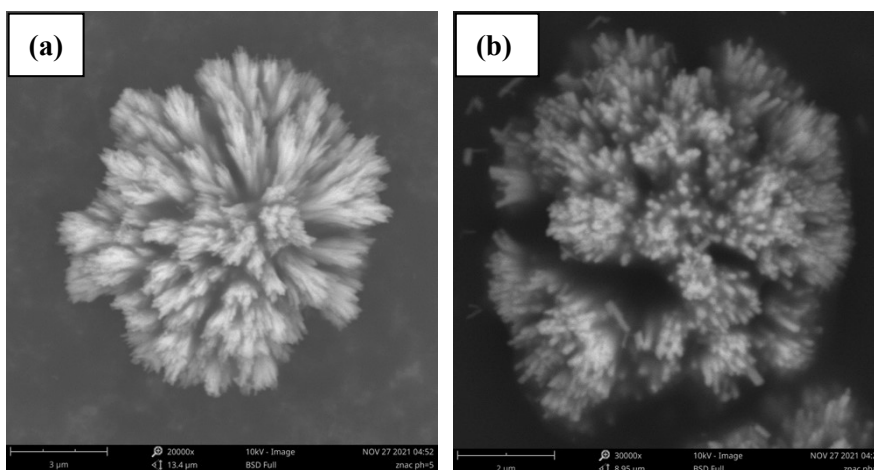

**Figure S7.** SEM images of Eu-MOF synthesized with  $Zn(Ac)_2+HAc$ : (a)  $PH=5$  (b)  $PH=4$ .

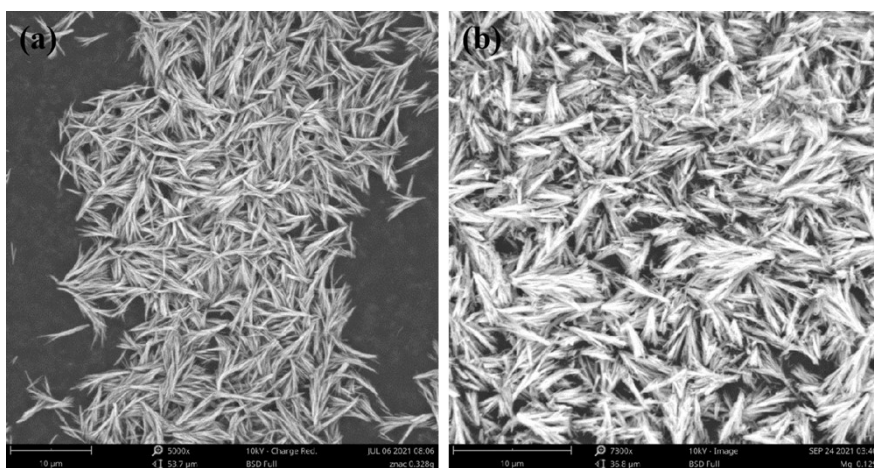

**Figure S8.** SEM images of Eu-MOF synthesized with different additives (a)  $NaAc$ , (b)  $Mg(Ac)_2$ .

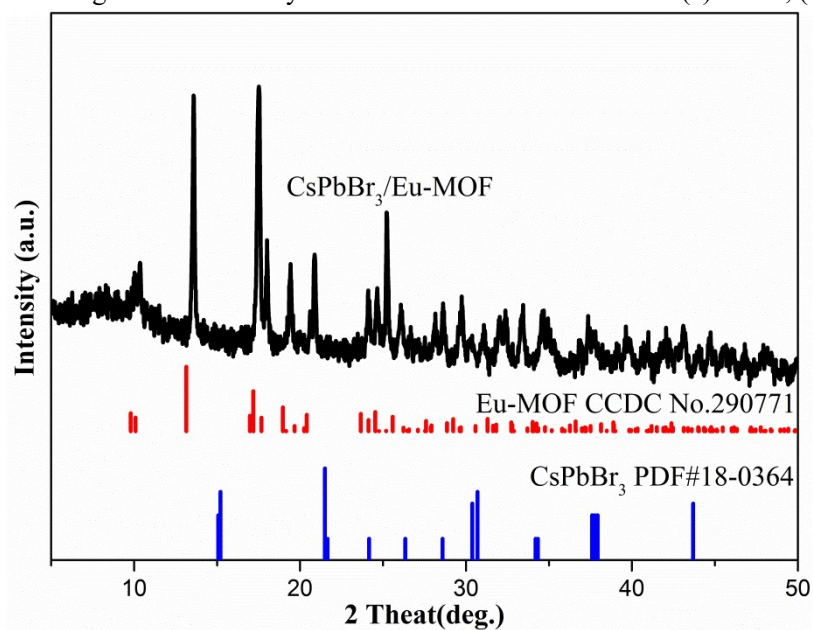

**Figure S9.** Simulated XRD patterns of Eu-MOF, the  $CsPbBr_3$  with PDF number of 18-0364, and the experimental XRD patterns of the as-prepared  $CsPbBr_3/Eu-MOF$ .

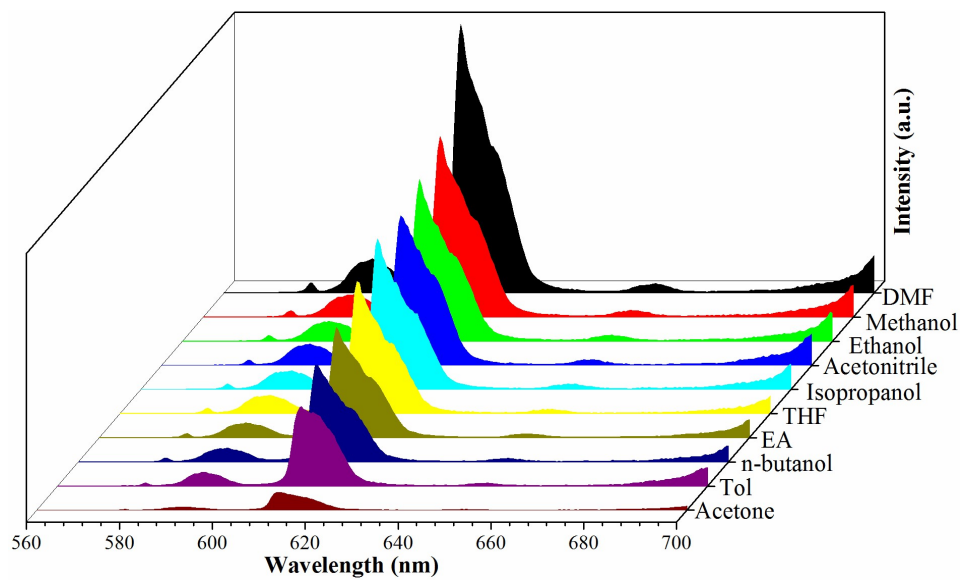

**Figure S10.** PL spectra of Eu-MOF introduced into various pure solvents when excited at 295 nm.
